# Supplementary material for: Menstrual cups and cash transfer to reduce sexual and reproductive harm and school dropout in adolescent schoolgirls: study protocol of a cluster-randomised controlled trial in western Kenya
Source: Springer Nature journal article supplement (doi:10.1186/s12889-019-7594-3), 2019-10-21
Supplement: MOESM2 [file 17296268]

|                                           |  |                                                                                                                                                                          |                 |         |
|-------------------------------------------|--|--------------------------------------------------------------------------------------------------------------------------------------------------------------------------|-----------------|---------|
| <b>Cups or Cash for Girls (CCg) Trial</b> |  | <b>Serious Adverse Event Form</b>                                                                                                                                        |                 |         |
|                                           |  | Sponsor: Liverpool School of Tropical Medicine,<br><a href="mailto:lstmgov@lstmed.ac.uk">lstmgov@lstmed.ac.uk</a> , <a href="mailto:pv@lstmed.ac.uk">pv@lstmed.ac.uk</a> |                 |         |
| Participant ID                            |  | Date of report                                                                                                                                                           | ___ - ___ - ___ | SAE no. |

|                |                                    |                               |
|----------------|------------------------------------|-------------------------------|
| Type of report | <input type="checkbox"/> Expedited | <input type="checkbox"/> Full |
|----------------|------------------------------------|-------------------------------|

**SECTION A: PATIENT DETAILS**

|             |                      |                                |                 |
|-------------|----------------------|--------------------------------|-----------------|
| Age (years) | <input type="text"/> | Or date of birth (DD-MMM-YYYY) | ___ - ___ - ___ |
|-------------|----------------------|--------------------------------|-----------------|

|                                                                    |  |  |  |
|--------------------------------------------------------------------|--|--|--|
| Relevant medical history including pre-existing medical conditions |  |  |  |
|--------------------------------------------------------------------|--|--|--|

|                                                                              |  |                                                          |  |
|------------------------------------------------------------------------------|--|----------------------------------------------------------|--|
| Informant relationship to participant i.e mother; clinic nurse; teacher; etc |  | Contact details of informant (phone number, address etc) |  |
|------------------------------------------------------------------------------|--|----------------------------------------------------------|--|

**SECTION B: SERIOUS ADVERSE EVENT AND INVESTIGATIONS**

|                |  |  |  |
|----------------|--|--|--|
| Main diagnosis |  |  |  |
|----------------|--|--|--|

|                                                                                                                           |                                                                                                                                                                                                                                                          |  |  |
|---------------------------------------------------------------------------------------------------------------------------|----------------------------------------------------------------------------------------------------------------------------------------------------------------------------------------------------------------------------------------------------------|--|--|
| Description of event (include details of all signs, symptoms and events that have occurred at the time of the main event) | <i>In cases of violence, please describe the nature of the violence and the clinical outcome for the patient i.e. any bruises, broken bones, cuts etc. Indicate on the diagram in appendix A the type and location of injuries on the body provided.</i> |  |  |
|                                                                                                                           | Use continuation sheet if necessary. Tick if continuation sheet used <input type="checkbox"/> How many pages? <input type="text"/>                                                                                                                       |  |  |

|                                        |                 |                             |                          |
|----------------------------------------|-----------------|-----------------------------|--------------------------|
| Date of onset/occurrence (DD-MMM-YYYY) | ___ - ___ - ___ | Date resolved (DD-MMM-YYYY) | ___ - ___ - ___          |
|                                        |                 | Or tick if ongoing          | <input type="checkbox"/> |

|                                           |  |                                                                                                                                                                          |                    |         |
|-------------------------------------------|--|--------------------------------------------------------------------------------------------------------------------------------------------------------------------------|--------------------|---------|
| <b>Cups or Cash for Girls (CCg) Trial</b> |  | <b>Serious Adverse Event Form</b>                                                                                                                                        |                    |         |
|                                           |  | Sponsor: Liverpool School of Tropical Medicine,<br><a href="mailto:lstmgov@lstmed.ac.uk">lstmgov@lstmed.ac.uk</a> , <a href="mailto:pv@lstmed.ac.uk">pv@lstmed.ac.uk</a> |                    |         |
| Participant ID                            |  | Date of report                                                                                                                                                           | ____ - ____ - ____ | SAE no. |

| Record details of investigations/relevant tests/laboratory data (including dates) | Investigation/test | Date | Result |
|-----------------------------------------------------------------------------------|--------------------|------|--------|
|                                                                                   |                    |      |        |
|                                                                                   |                    |      |        |
|                                                                                   |                    |      |        |
|                                                                                   |                    |      |        |
|                                                                                   |                    |      |        |
|                                                                                   |                    |      |        |
|                                                                                   |                    |      |        |

**SECTION C: EVENT ASSESSMENT**

*When completing below please refer to definition guide at the end of this document*

|                         |                                                                                                                                                                                                        |                                                                                                                                                                                                          |
|-------------------------|--------------------------------------------------------------------------------------------------------------------------------------------------------------------------------------------------------|----------------------------------------------------------------------------------------------------------------------------------------------------------------------------------------------------------|
| <b>Action taken</b>     | <input type="checkbox"/> None<br><input type="checkbox"/> Medication given; specify _____<br><input type="checkbox"/> Referred to hospital OPD/health facility; name of hospital/health facility _____ | <input type="checkbox"/> Admitted as inpatient to hospital; name of hospital _____<br><input type="checkbox"/> Intervention (cash and/or cup) withdrawn<br><input type="checkbox"/> Other; Specify _____ |
| <b>Outcome</b>          | <input type="checkbox"/> Resolved<br><input type="checkbox"/> Resolving/partly resolved<br><input type="checkbox"/> Resolved with sequelae                                                             | <input type="checkbox"/> Not resolved<br><input type="checkbox"/> Fatal<br><input type="checkbox"/> Unknown                                                                                              |
| <b>Maximum severity</b> | <input type="checkbox"/> Mild<br><input type="checkbox"/> Moderate                                                                                                                                     | <input type="checkbox"/> Severe<br><input type="checkbox"/> Life threatening<br><input type="checkbox"/> Fatal<br><input type="checkbox"/> Unable to assess                                              |

|                                           |  |                                                                                                                                                                          |                    |         |
|-------------------------------------------|--|--------------------------------------------------------------------------------------------------------------------------------------------------------------------------|--------------------|---------|
| <b>Cups or Cash for Girls (CCg) Trial</b> |  | <b>Serious Adverse Event Form</b>                                                                                                                                        |                    |         |
|                                           |  | Sponsor: Liverpool School of Tropical Medicine,<br><a href="mailto:lstmgov@lstmed.ac.uk">lstmgov@lstmed.ac.uk</a> , <a href="mailto:pv@lstmed.ac.uk">pv@lstmed.ac.uk</a> |                    |         |
| Participant ID                            |  | Date of report                                                                                                                                                           | ____ - ____ - ____ | SAE no. |

|                    |                                                                   |                                                     |
|--------------------|-------------------------------------------------------------------|-----------------------------------------------------|
| <b>Seriousness</b> | <input type="checkbox"/> Death                                    | <i>If death:</i>                                    |
|                    | <input type="checkbox"/> Life threatening                         | Date of death (DD-MMM-YYYY)<br>____ - ____ - ____   |
|                    | <input type="checkbox"/> Hospitalisation                          | <i>If hospitalisation:</i>                          |
|                    | <input type="checkbox"/> Prolongation of existing hospitalisation | Date admitted (DD-MMM-YYYY)<br>____ - ____ - ____   |
|                    | <input type="checkbox"/> Persistent or significant disability     | Date discharged (DD-MMM-YYYY)<br>____ - ____ - ____ |
|                    | <input type="checkbox"/> Other                                    |                                                     |
|                    | If other, specify                                                 |                                                     |

**SECTION D: INTERVENTION**

|                              |                               |                                     |                                                   |
|------------------------------|-------------------------------|-------------------------------------|---------------------------------------------------|
| Cup <input type="checkbox"/> | Cash <input type="checkbox"/> | Cup & Cash <input type="checkbox"/> | Usual practice (control) <input type="checkbox"/> |
|------------------------------|-------------------------------|-------------------------------------|---------------------------------------------------|

*If the event is related to menstrual or vaginal health, complete the following questions:*

|                                                          |                                                             |                                                                    |                                                             |
|----------------------------------------------------------|-------------------------------------------------------------|--------------------------------------------------------------------|-------------------------------------------------------------|
| Was the girl having her monthly period at time of event? | <input type="checkbox"/> Yes<br><input type="checkbox"/> No | Did the girl have an item inserted in her vagina at time of event? | <input type="checkbox"/> Yes<br><input type="checkbox"/> No |
|----------------------------------------------------------|-------------------------------------------------------------|--------------------------------------------------------------------|-------------------------------------------------------------|

|                                                                                                                    |                                                             |                                            |                                        |                                               |
|--------------------------------------------------------------------------------------------------------------------|-------------------------------------------------------------|--------------------------------------------|----------------------------------------|-----------------------------------------------|
| If not at time of event, did she have an item inside her vagina on a recent day prior to the event (just removed)? | <input type="checkbox"/> Yes<br><input type="checkbox"/> No | Name of item which was inserted in vagina: | <input type="checkbox"/> Rags          | <input type="checkbox"/> Traditional medicine |
|                                                                                                                    |                                                             |                                            | <input type="checkbox"/> Grass         | <input type="checkbox"/> Cup                  |
|                                                                                                                    |                                                             |                                            | <input type="checkbox"/> Newspaper     | <input type="checkbox"/> Tissue paper         |
|                                                                                                                    |                                                             |                                            | <input type="checkbox"/> Foam/bedding  | <input type="checkbox"/> Cotton wool          |
|                                                                                                                    |                                                             |                                            | <input type="checkbox"/> Sanitary pads | <input type="checkbox"/> Other; Specify       |

|                                           |  |                                                                                                                                                                          |                 |         |
|-------------------------------------------|--|--------------------------------------------------------------------------------------------------------------------------------------------------------------------------|-----------------|---------|
| <b>Cups or Cash for Girls (CCg) Trial</b> |  | <b>Serious Adverse Event Form</b>                                                                                                                                        |                 |         |
|                                           |  | Sponsor: Liverpool School of Tropical Medicine,<br><a href="mailto:lstmgov@lstmed.ac.uk">lstmgov@lstmed.ac.uk</a> , <a href="mailto:pv@lstmed.ac.uk">pv@lstmed.ac.uk</a> |                 |         |
| Participant ID                            |  | Date of report                                                                                                                                                           | ___ - ___ - ___ | SAE no. |

**SECTION E: OTHER MEDICINE(S)/SUBSTANCE(S)**

Were any other medicines taken up to two weeks prior to the onset of SAE?  Yes  No  
*If yes, complete a concomitant drugs form and send with this SAE form*

Were any traditional medicines taken up to two weeks prior to the onset of SAE?  Yes  No

If yes, give details

Were any other substances (e.g. alcohol, recreational drugs) taken in the two weeks prior to the onset of SAE?  Yes  No

If yes, give details

**SECTION F: CAUSALITY ASSESSMENT**

Using the key below, insert number in the box to indicate causality for each intervention relevant to the patient. If the patient has not received the specified intervention, enter "7".  
 If you suspect the event is related to something **other** than the intervention(s), enter the causality in the 'other' box and provide further details on the continuation sheet.

|                  |                                                                                                                                                                                                                                                                |                            |
|------------------|----------------------------------------------------------------------------------------------------------------------------------------------------------------------------------------------------------------------------------------------------------------|----------------------------|
| <b>Causality</b> | <ol style="list-style-type: none"> <li>1. Certain</li> <li>2. Probable/likely</li> <li>3. Possible</li> <li>4. Unlikely</li> <li>5. Unrelated</li> <li>6. Unassessable</li> <li>7. Not applicable (i.e. participant not receiving the intervention)</li> </ol> | Cup <input type="text"/>   |
|                  |                                                                                                                                                                                                                                                                | Cash <input type="text"/>  |
|                  |                                                                                                                                                                                                                                                                | Other <input type="text"/> |

|                                           |  |                                                                                                                                                                          |                    |         |
|-------------------------------------------|--|--------------------------------------------------------------------------------------------------------------------------------------------------------------------------|--------------------|---------|
| <b>Cups or Cash for Girls (CCg) Trial</b> |  | <b>Serious Adverse Event Form</b>                                                                                                                                        |                    |         |
|                                           |  | Sponsor: Liverpool School of Tropical Medicine,<br><a href="mailto:lstmgov@lstmed.ac.uk">lstmgov@lstmed.ac.uk</a> , <a href="mailto:pv@lstmed.ac.uk">pv@lstmed.ac.uk</a> |                    |         |
| Participant ID                            |  | Date of report                                                                                                                                                           | ____ - ____ - ____ | SAE no. |

**SECTION F: CAUSALITY ASSESSMENT (continued)**

*If the answer to the above is 1, 2 or 3 for any intervention, complete the following assessments **FOR THE RELEVANT INTERVENTION ONLY***

|                                                  |                                                                                                                                                                                                                                             |                                |
|--------------------------------------------------|---------------------------------------------------------------------------------------------------------------------------------------------------------------------------------------------------------------------------------------------|--------------------------------|
| <b>Action taken due to adverse event</b>         | <ol style="list-style-type: none"> <li>1. Intervention/other withdrawn</li> <li>2. Intervention/other withheld</li> <li>3. None</li> <li>4. Not applicable</li> <li>5. Unknown</li> </ol>                                                   | Cup <input type="checkbox"/>   |
|                                                  |                                                                                                                                                                                                                                             | Cash <input type="checkbox"/>  |
|                                                  |                                                                                                                                                                                                                                             | Other <input type="checkbox"/> |
| <b>De-challenge</b>                              | <ol style="list-style-type: none"> <li>1. Improved when intervention/other stopped</li> <li>2. No improvement when intervention/other stopped</li> <li>3. Not applicable (<u>no</u> de-challenge undertaken)</li> <li>4. Unknown</li> </ol> | Cup <input type="checkbox"/>   |
|                                                  |                                                                                                                                                                                                                                             | Cash <input type="checkbox"/>  |
|                                                  |                                                                                                                                                                                                                                             | Other <input type="checkbox"/> |
| <b>History with suspected intervention/other</b> | <ol style="list-style-type: none"> <li>1. Not used before</li> <li>2. Used before, this event <b>did not</b> occur</li> <li>3. Used before, this event <b>did</b> occur</li> <li>4. Unknown</li> </ol>                                      | Cup <input type="checkbox"/>   |
|                                                  |                                                                                                                                                                                                                                             | Cash <input type="checkbox"/>  |
|                                                  |                                                                                                                                                                                                                                             | Other <input type="checkbox"/> |

|                                           |  |                                                                                                                                                                          |                  |         |
|-------------------------------------------|--|--------------------------------------------------------------------------------------------------------------------------------------------------------------------------|------------------|---------|
| <b>Cups or Cash for Girls (CCg) Trial</b> |  | <b>Serious Adverse Event Form</b>                                                                                                                                        |                  |         |
|                                           |  | Sponsor: Liverpool School of Tropical Medicine,<br><a href="mailto:lstmgov@lstmed.ac.uk">lstmgov@lstmed.ac.uk</a> , <a href="mailto:pv@lstmed.ac.uk">pv@lstmed.ac.uk</a> |                  |         |
| Participant ID                            |  | Date of report                                                                                                                                                           | ___ - ___ - ____ | SAE no. |

**SECTION G: REPORTER DETAILS**

|                    |  |                    |                  |
|--------------------|--|--------------------|------------------|
| Reporter Name      |  | Reporter Position  |                  |
| Reporter Signature |  | Date (DD-MMM-YYYY) | ___ - ___ - ____ |

**SECTION H: PRINCIPAL INVESTIGATOR RECEIPT**

|              |  |                    |                  |
|--------------|--|--------------------|------------------|
| PI Name      |  |                    |                  |
| PI Signature |  | Date (DD-MMM-YYYY) | ___ - ___ - ____ |

|                                           |  |                                                                                                                                                                          |                 |         |
|-------------------------------------------|--|--------------------------------------------------------------------------------------------------------------------------------------------------------------------------|-----------------|---------|
| <b>Cups or Cash for Girls (CCg) Trial</b> |  | <b>Serious Adverse Event Form</b>                                                                                                                                        |                 |         |
|                                           |  | Sponsor: Liverpool School of Tropical Medicine,<br><a href="mailto:lstmgov@lstmed.ac.uk">lstmgov@lstmed.ac.uk</a> , <a href="mailto:pv@lstmed.ac.uk">pv@lstmed.ac.uk</a> |                 |         |
| Participant ID                            |  | Date of report                                                                                                                                                           | ___ - ___ - ___ | SAE no. |

Appendix A. Body diagram – if appropriate, please indicate location of illness, infection, or injuries

**APPENDIX A. BODY DIAGRAM**  
*Please indicate with an arrow and words the location, and the type of illness, infection, or injuries on the diagram below (includes severe pain or bleeding)*

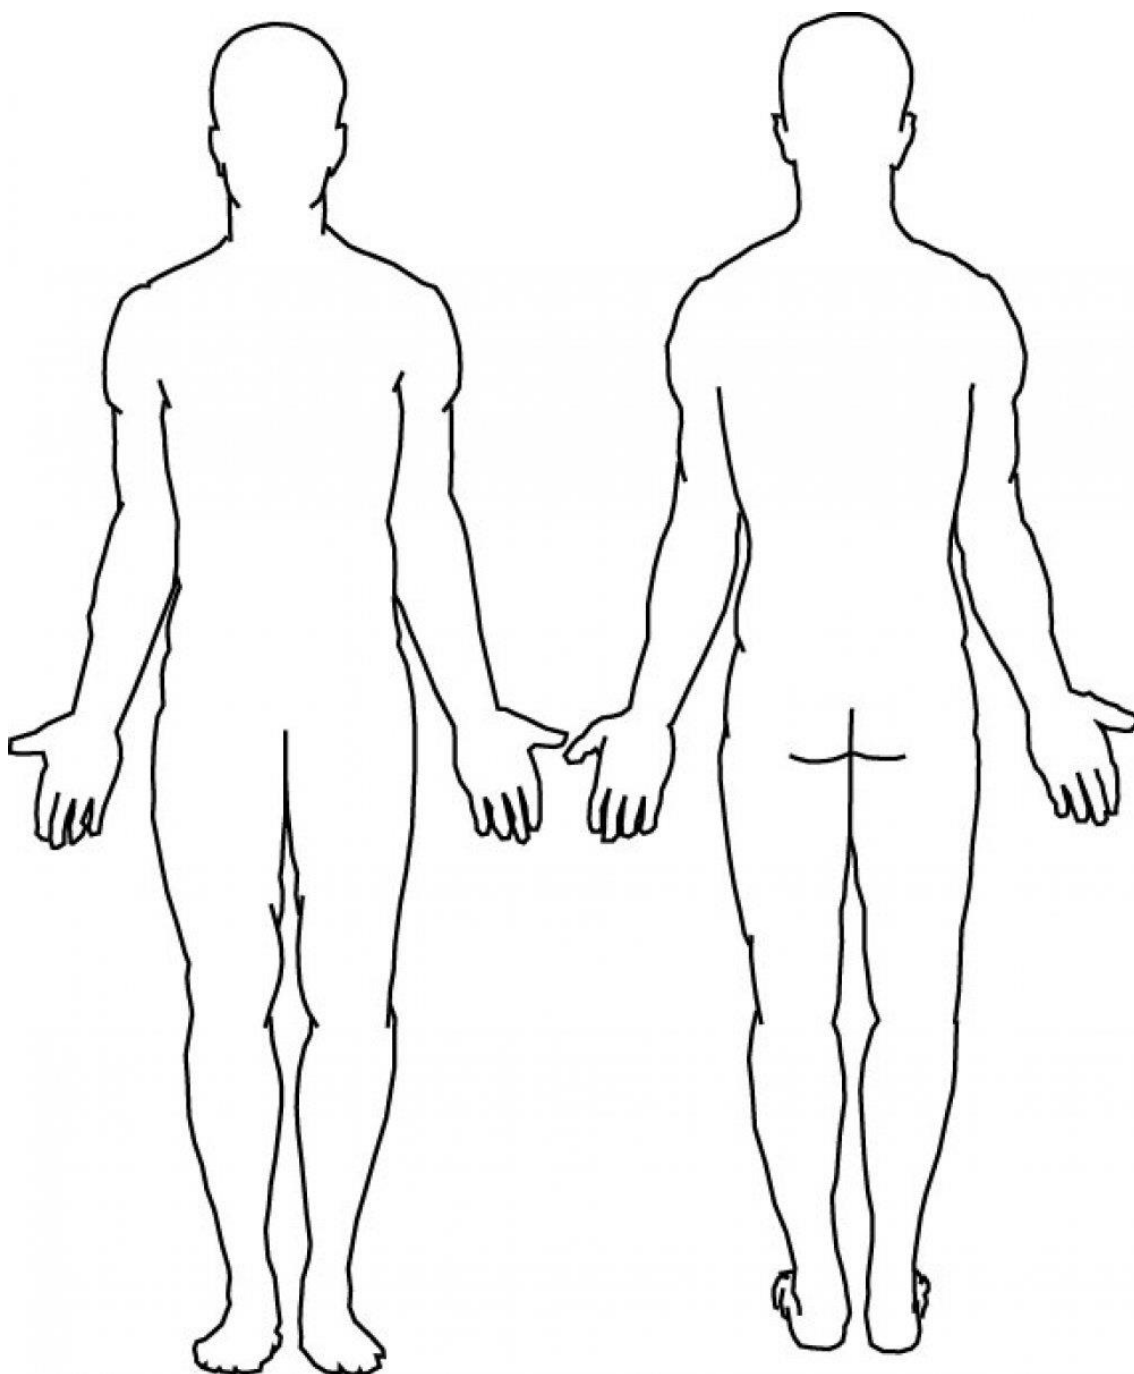

|                                           |  |                                                                                                                                                                          |                  |                |
|-------------------------------------------|--|--------------------------------------------------------------------------------------------------------------------------------------------------------------------------|------------------|----------------|
| <b>Cups or Cash for Girls (CCg) Trial</b> |  | <b><i>Serious Adverse Event Form</i></b>                                                                                                                                 |                  |                |
|                                           |  | Sponsor: Liverpool School of Tropical Medicine,<br><a href="mailto:lstmgov@lstmed.ac.uk">lstmgov@lstmed.ac.uk</a> , <a href="mailto:pv@lstmed.ac.uk">pv@lstmed.ac.uk</a> |                  |                |
| <b>Participant ID</b>                     |  | <b>Date of report</b>                                                                                                                                                    | ___ - ___ - ____ | <b>SAE no.</b> |

**APPENDIX B. CONTINUATION SHEET**
